# Supplementary material for: Massive NGS data analysis reveals hundreds of potential novel gene fusions in human cell lines
Source: PubMed Central journal article supplement (PMC6207142; doi:10.1093/gigascience/giy062), 2018-06-01
Supplement: giy062_response_to_reviewer_comments_revision_2.pdf [file giy062_response_to_reviewer_comments_revision_2.pdf]

## Author's Response To Reviewer Comments

Close

Dear Editor,

as requested in point (1), a reference to our GigaDB dataset has been included in the bibliography with the number 33.

We also made the necessary corrections requested in point (2) and uploaded a revised manuscript.

Best regards,  
Tiziana Castrignanò

Close
